# Supplementary material for: Species-specific AAVR dominates species-tropism of adeno-associated virus (AAV) vectors
Source: Research Square preprint supplement (doi:10.21203/rs.3.rs-8198480/v1), 2025-12-05

**Related to Fig. 1A\_WB\_beta actin**

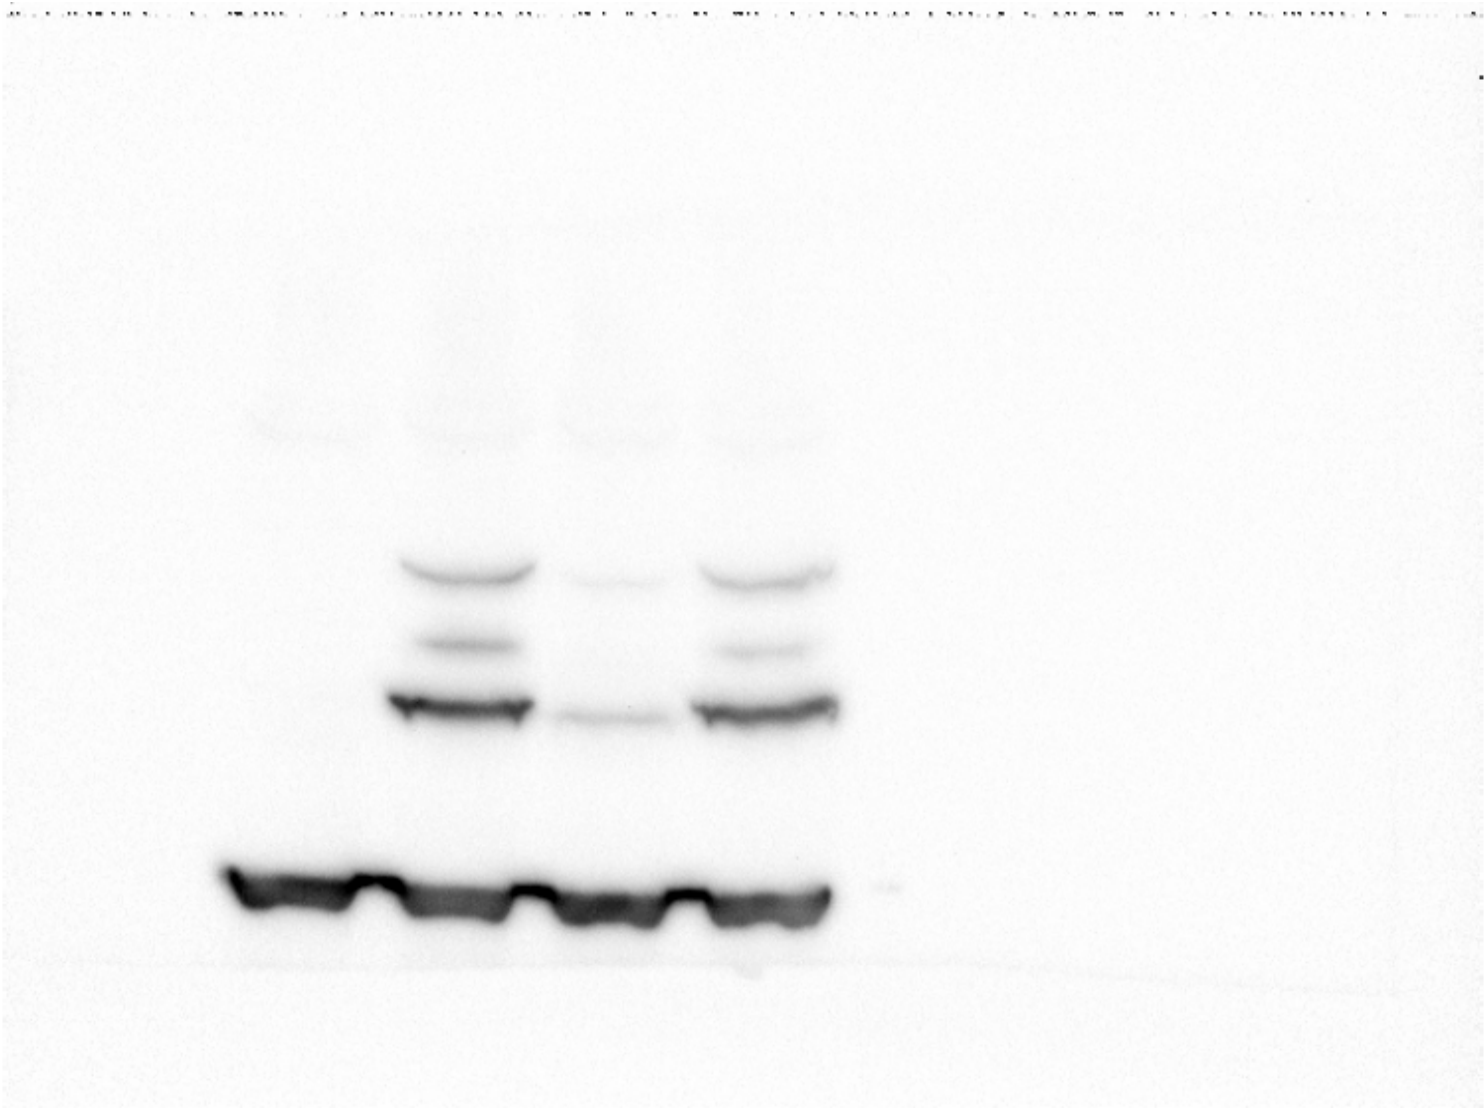

**Related to Fig. 1A\_WB\_VP bands**

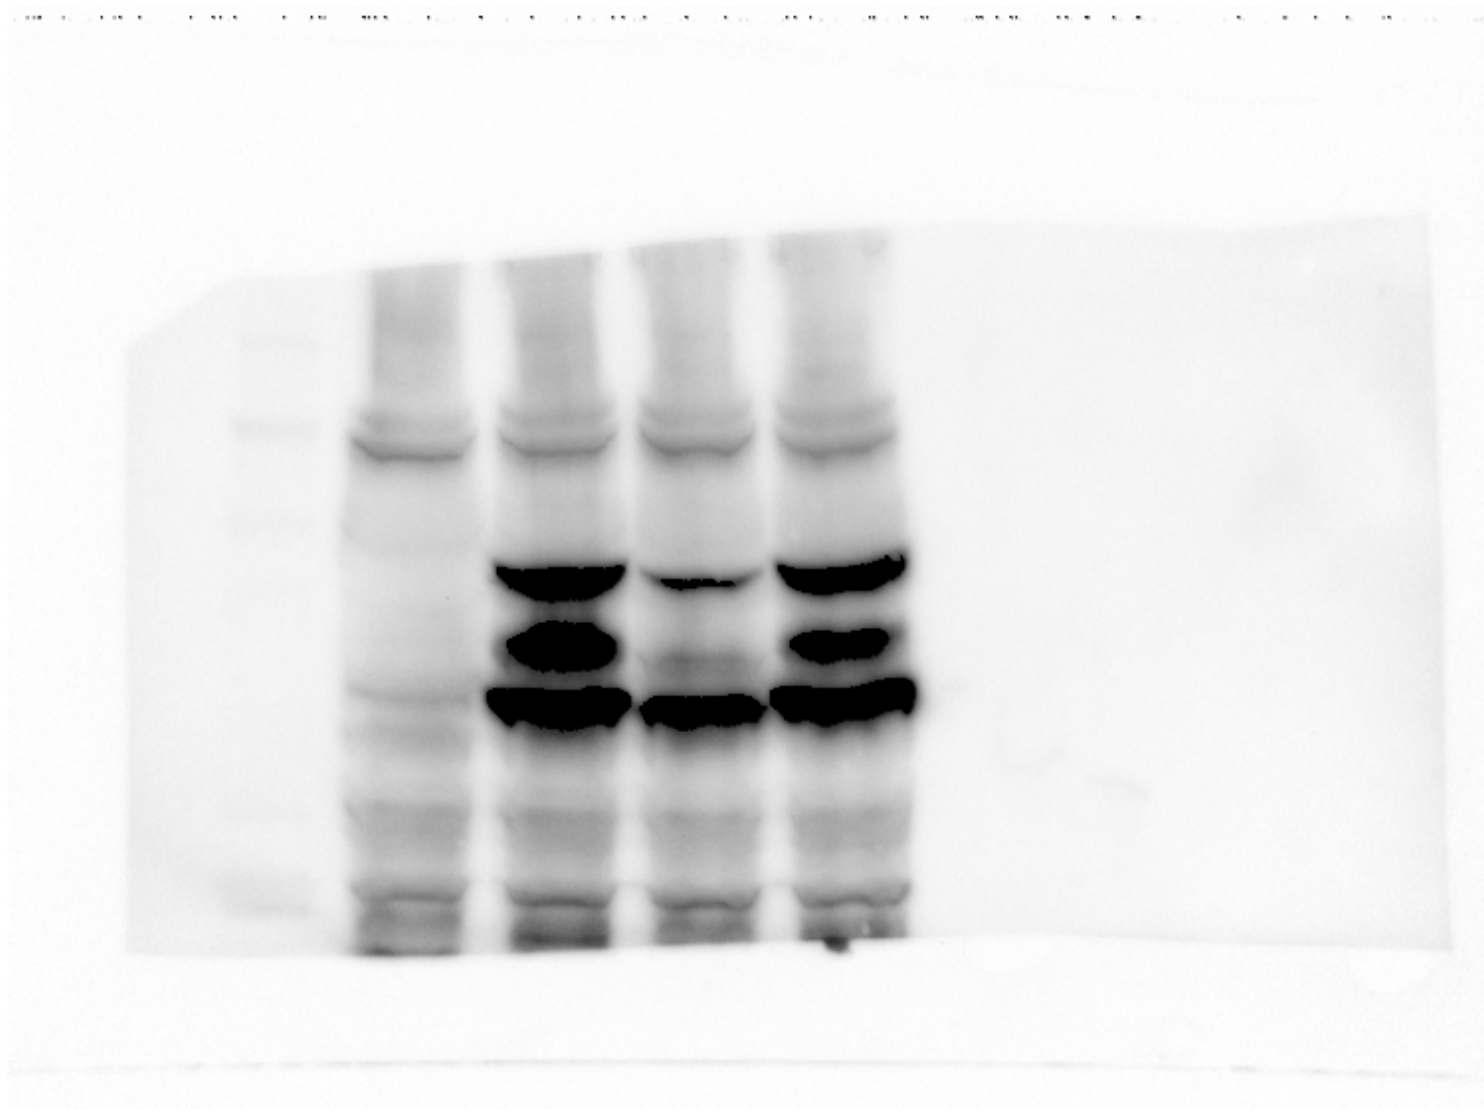

Related to Fig. S4C\_WB\_AAVR KO\_AAVR

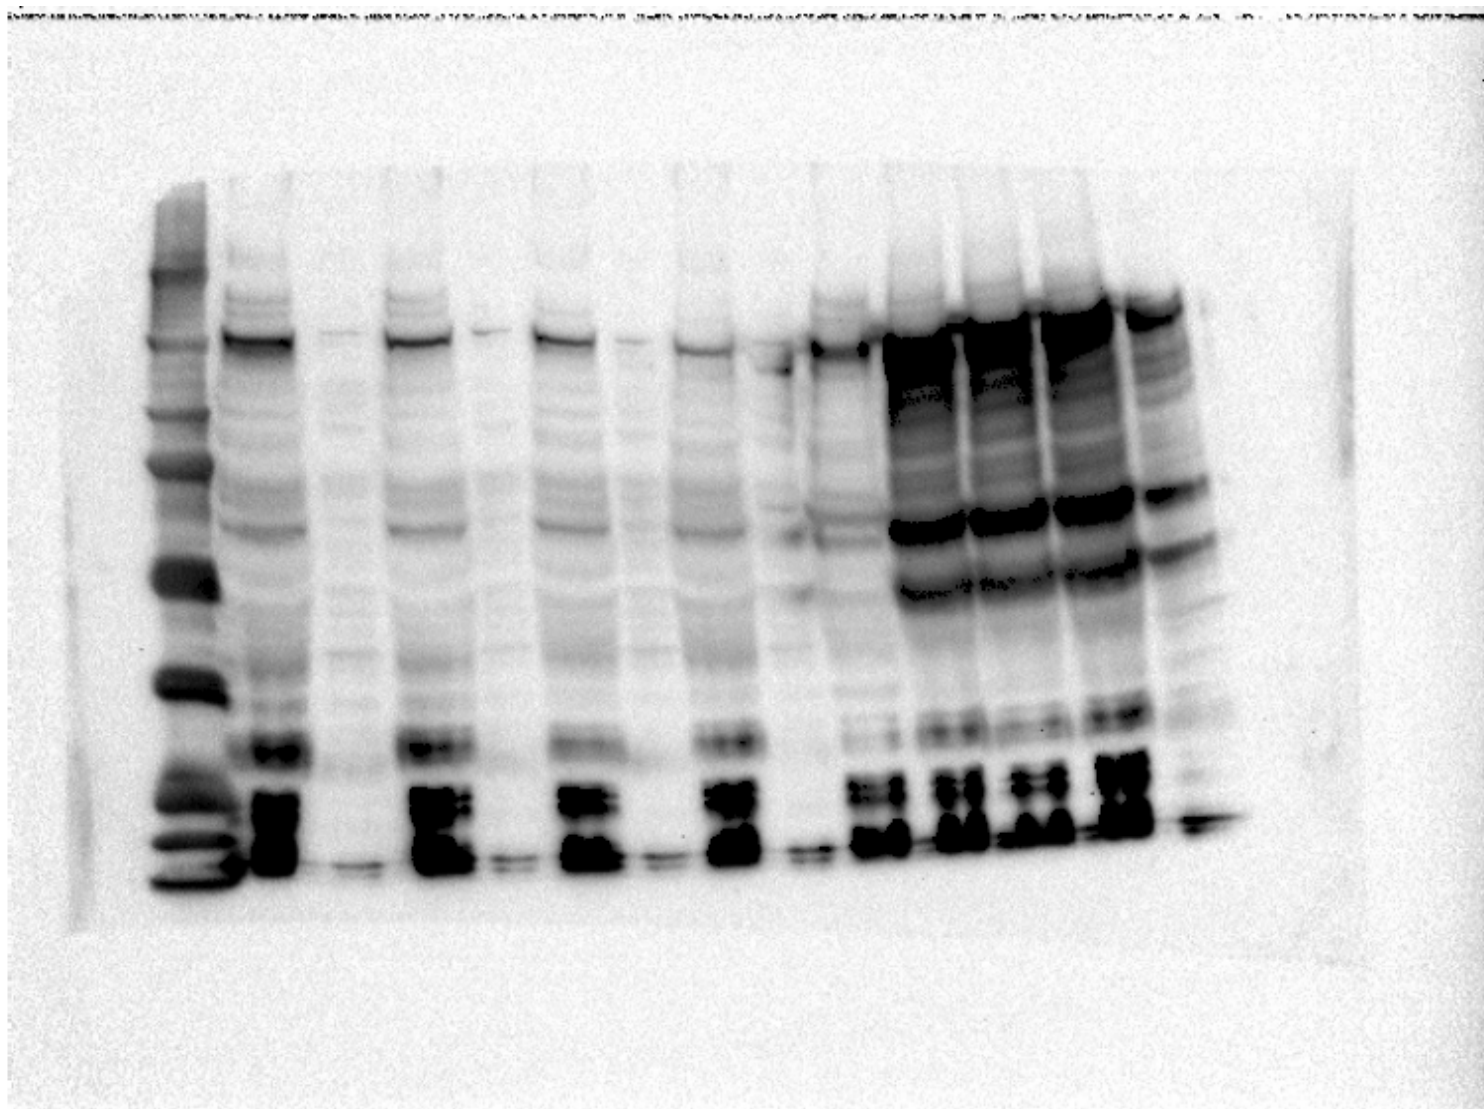

Related to Fig. S4C\_WB\_AAVR KO\_beta actin

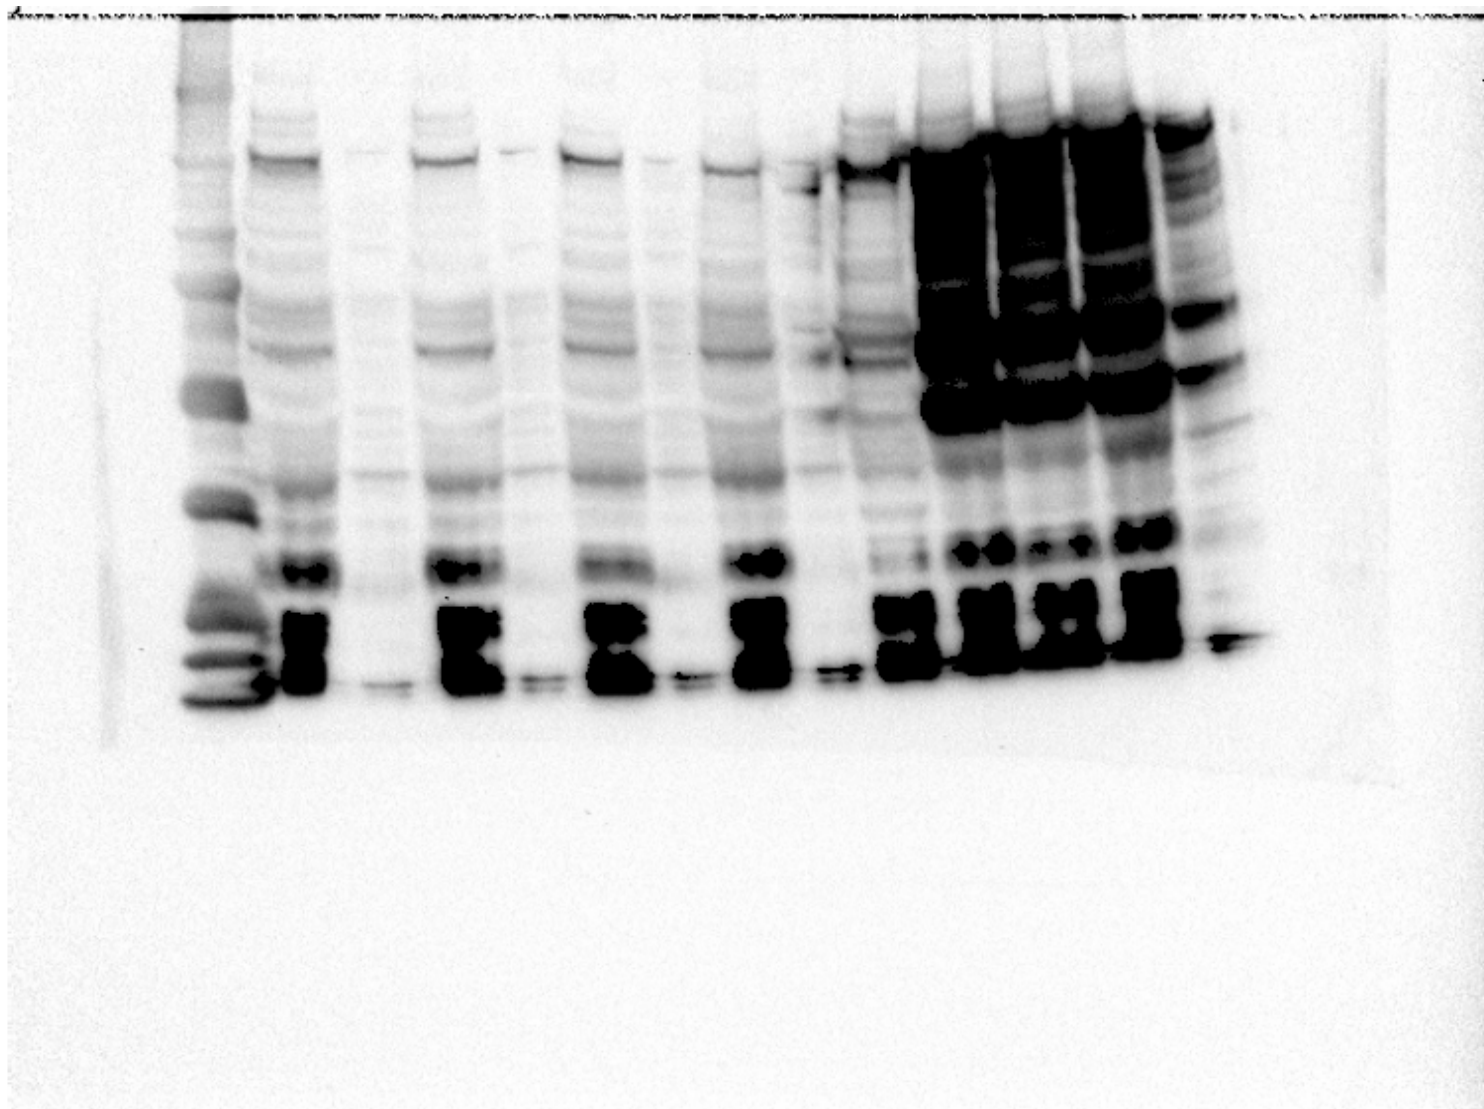



Related to Fig. S4D\_WB\_AAVR

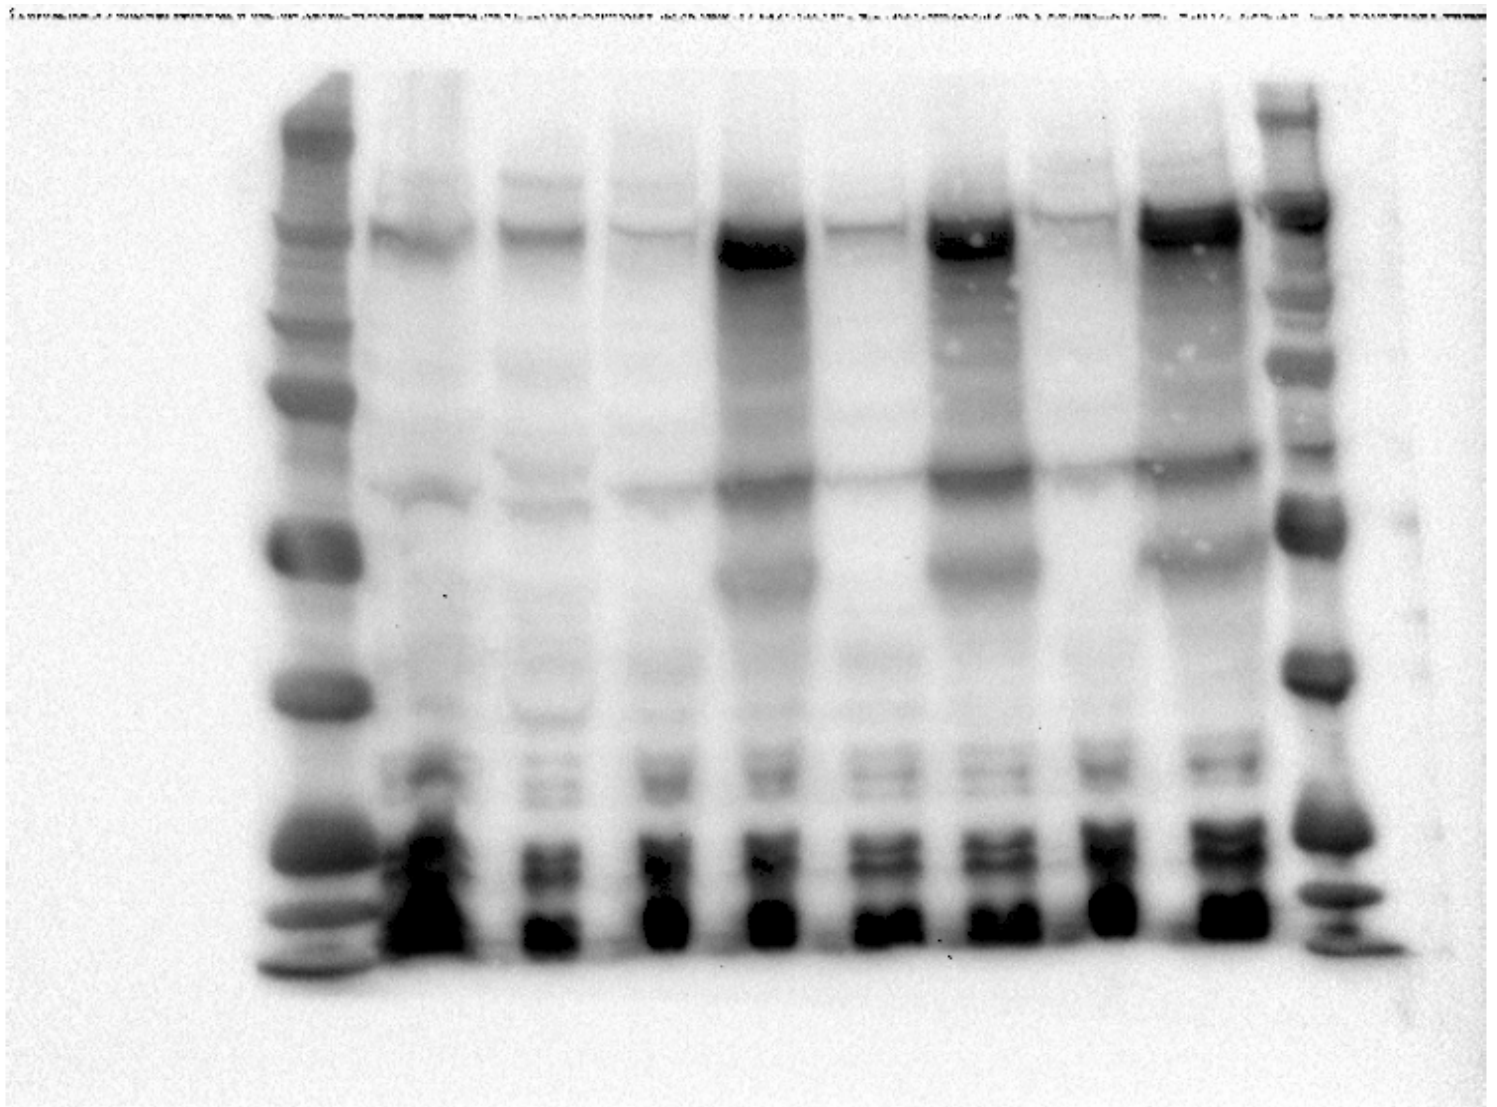

Related to Fig. S4D\_WB\_beta actin

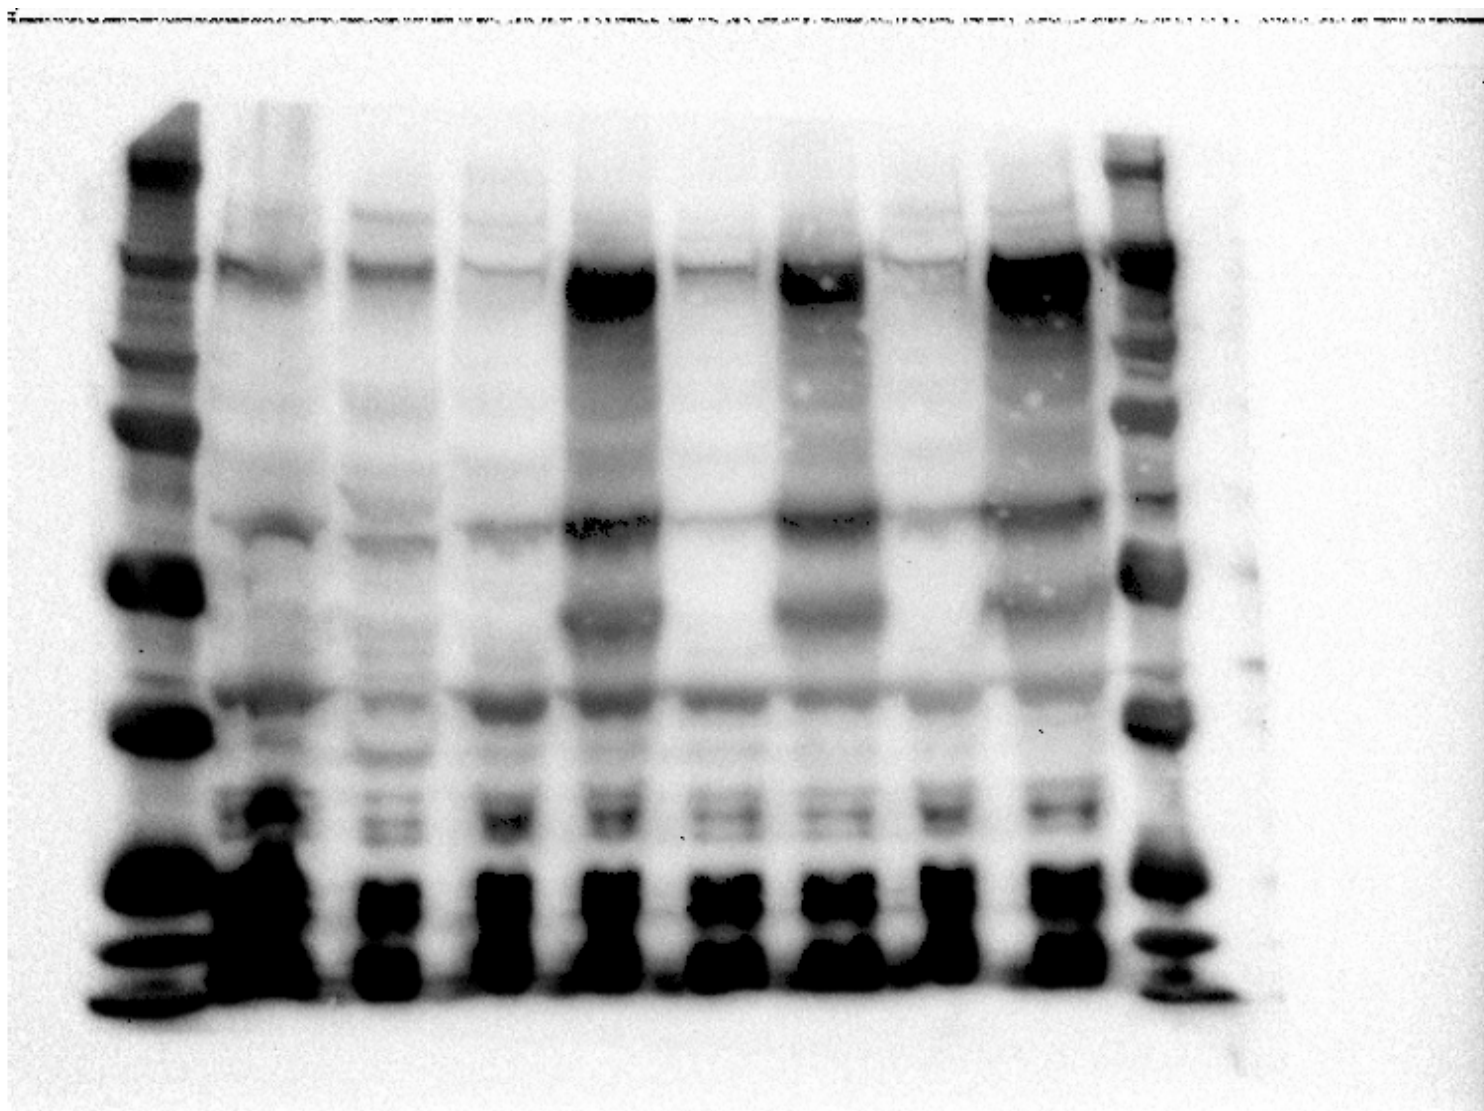

# Related to Fig. S4E\_WB

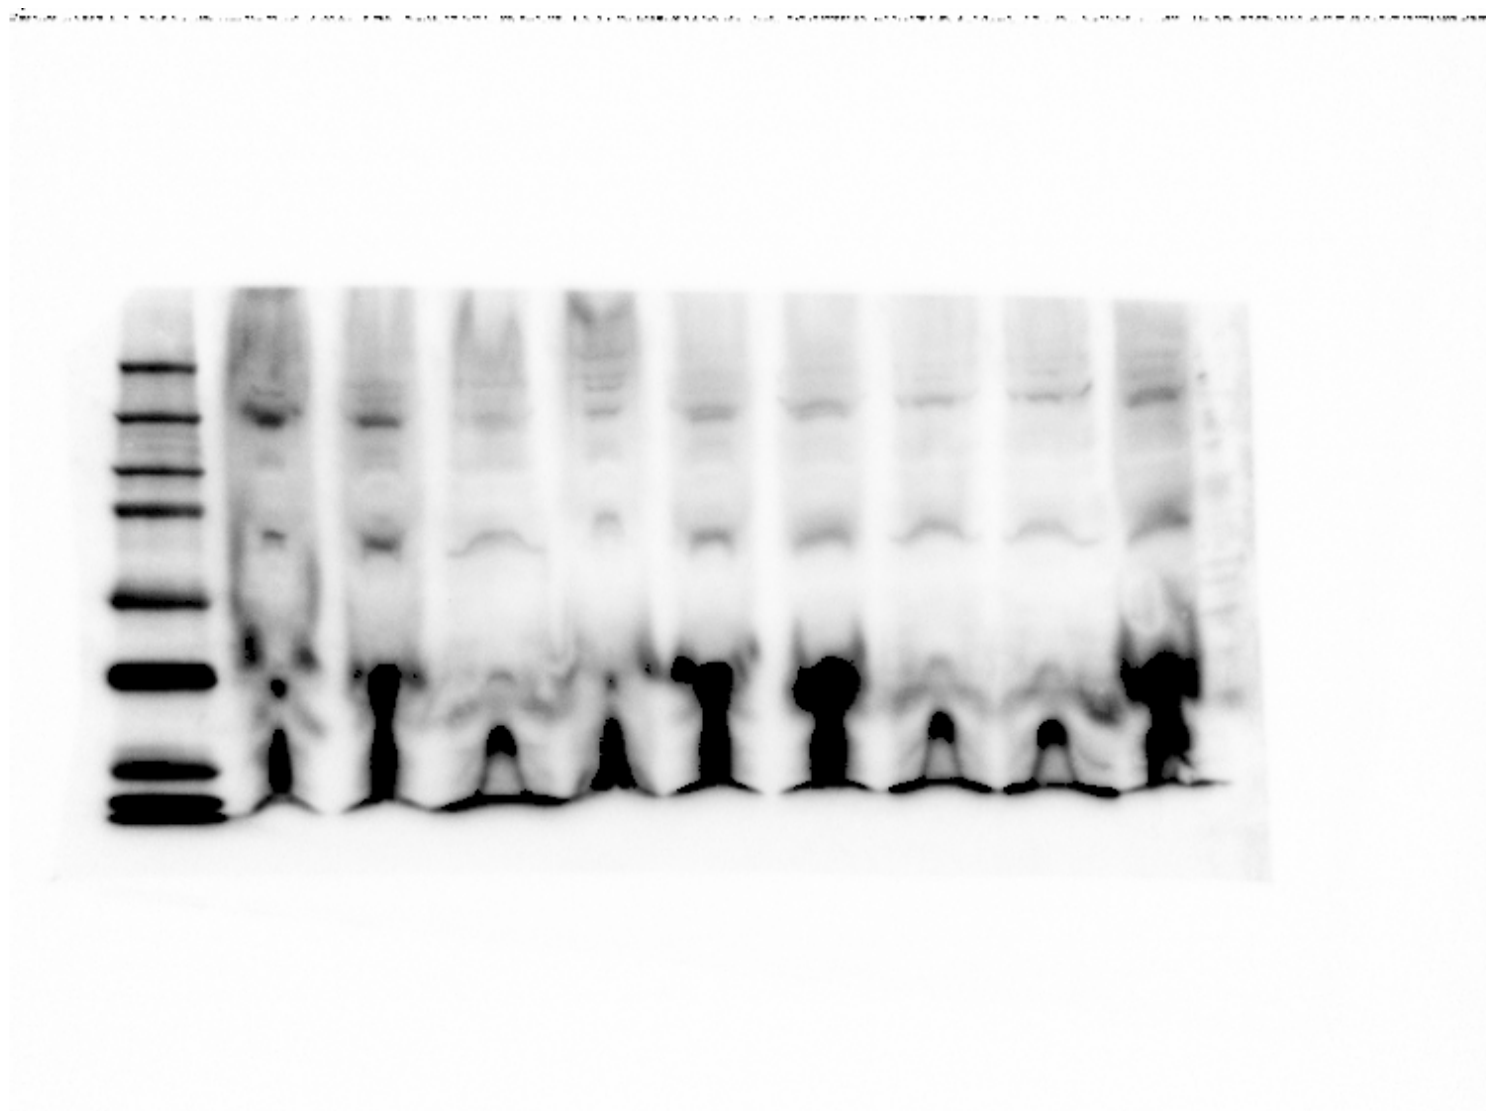

**Related to Fig. S8B\_coomassie blue staining**

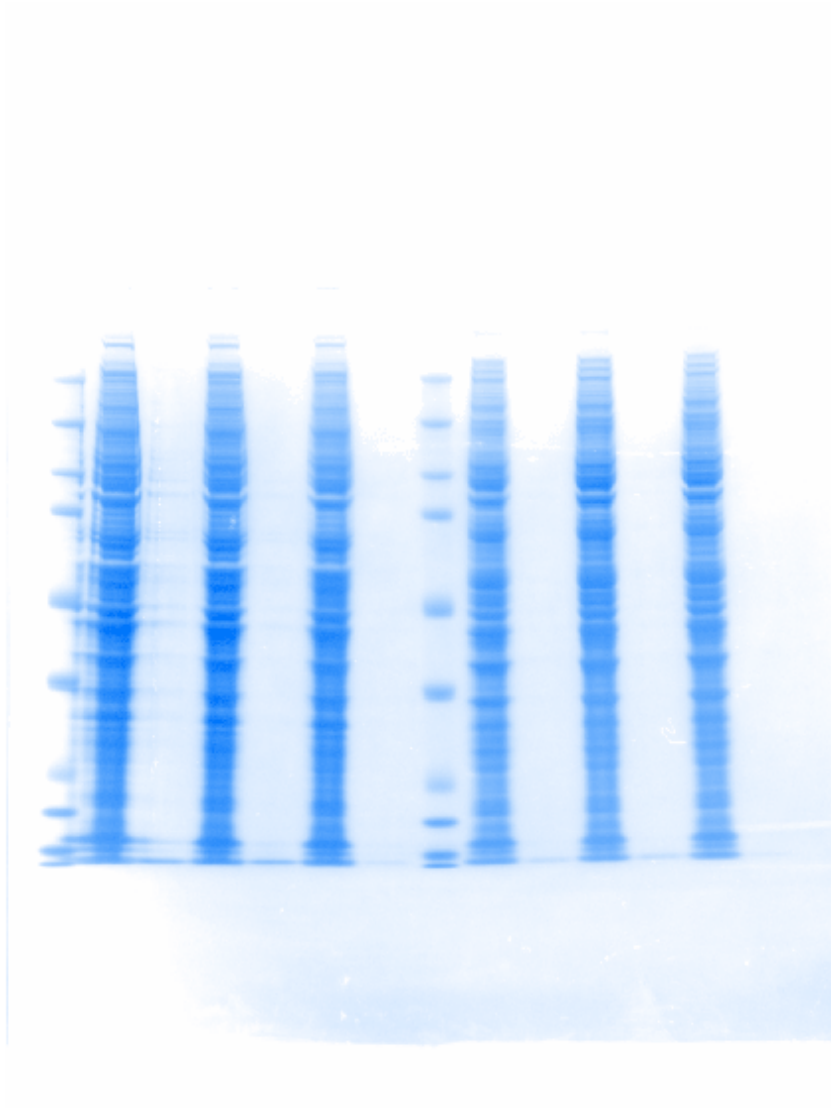

Related to Fig. 8A\_Southern blotting

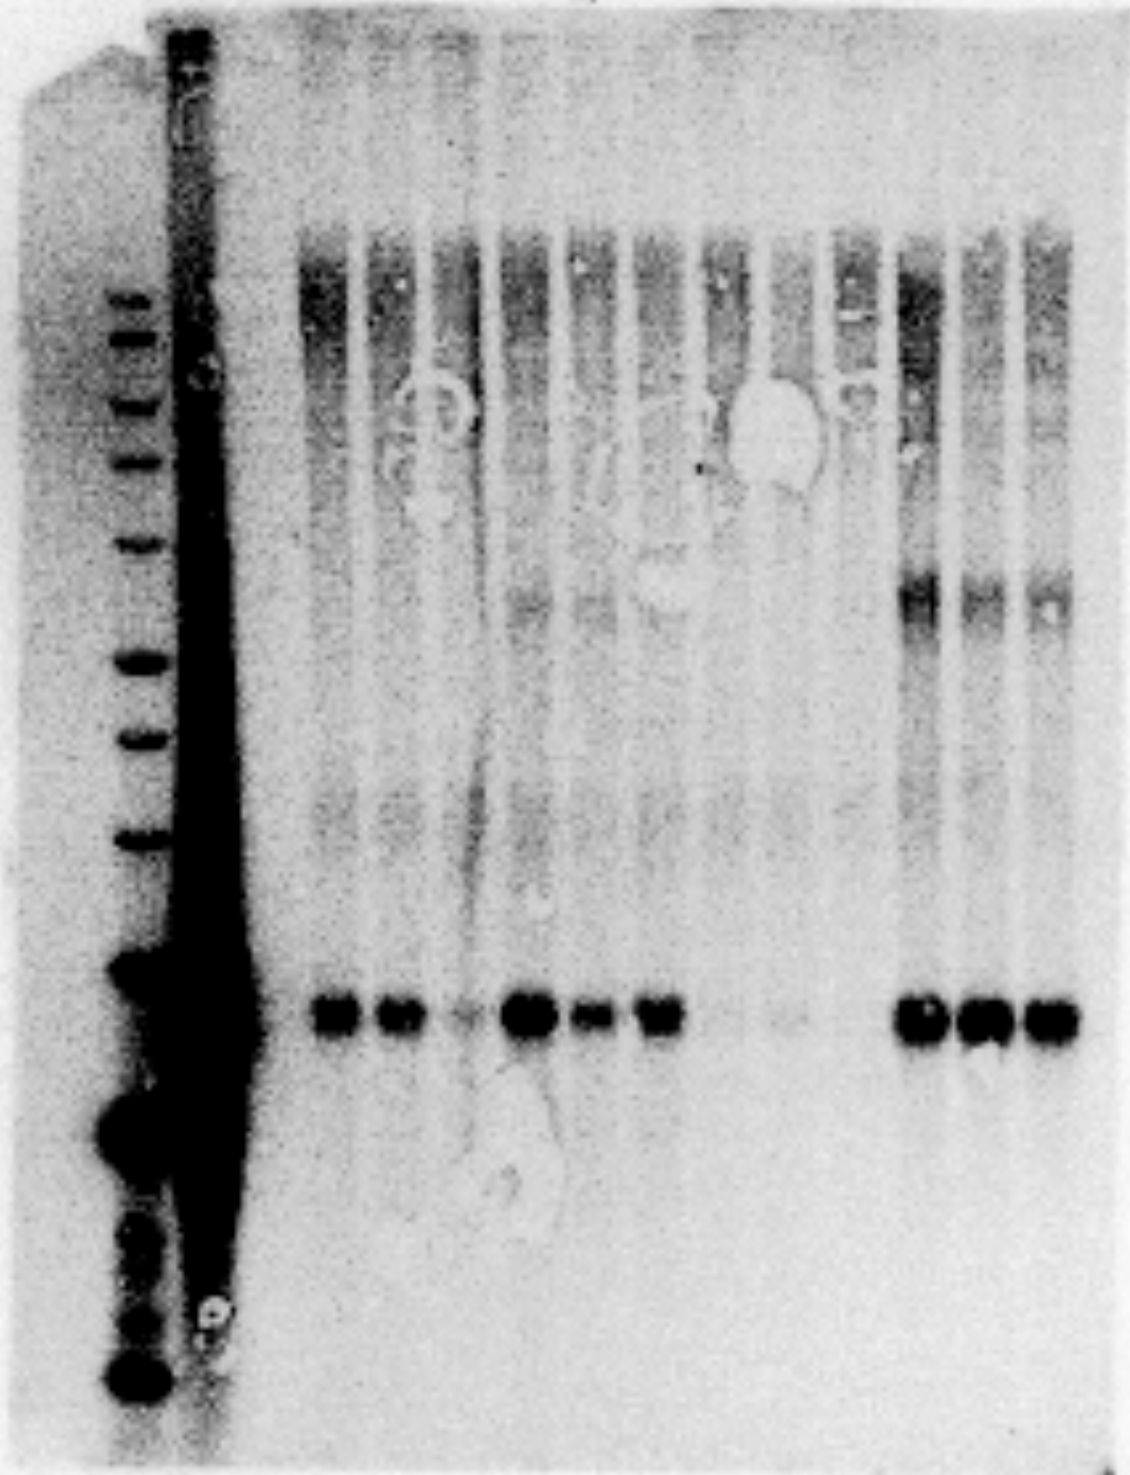

Related to Fig. 8B\_Southern blotting

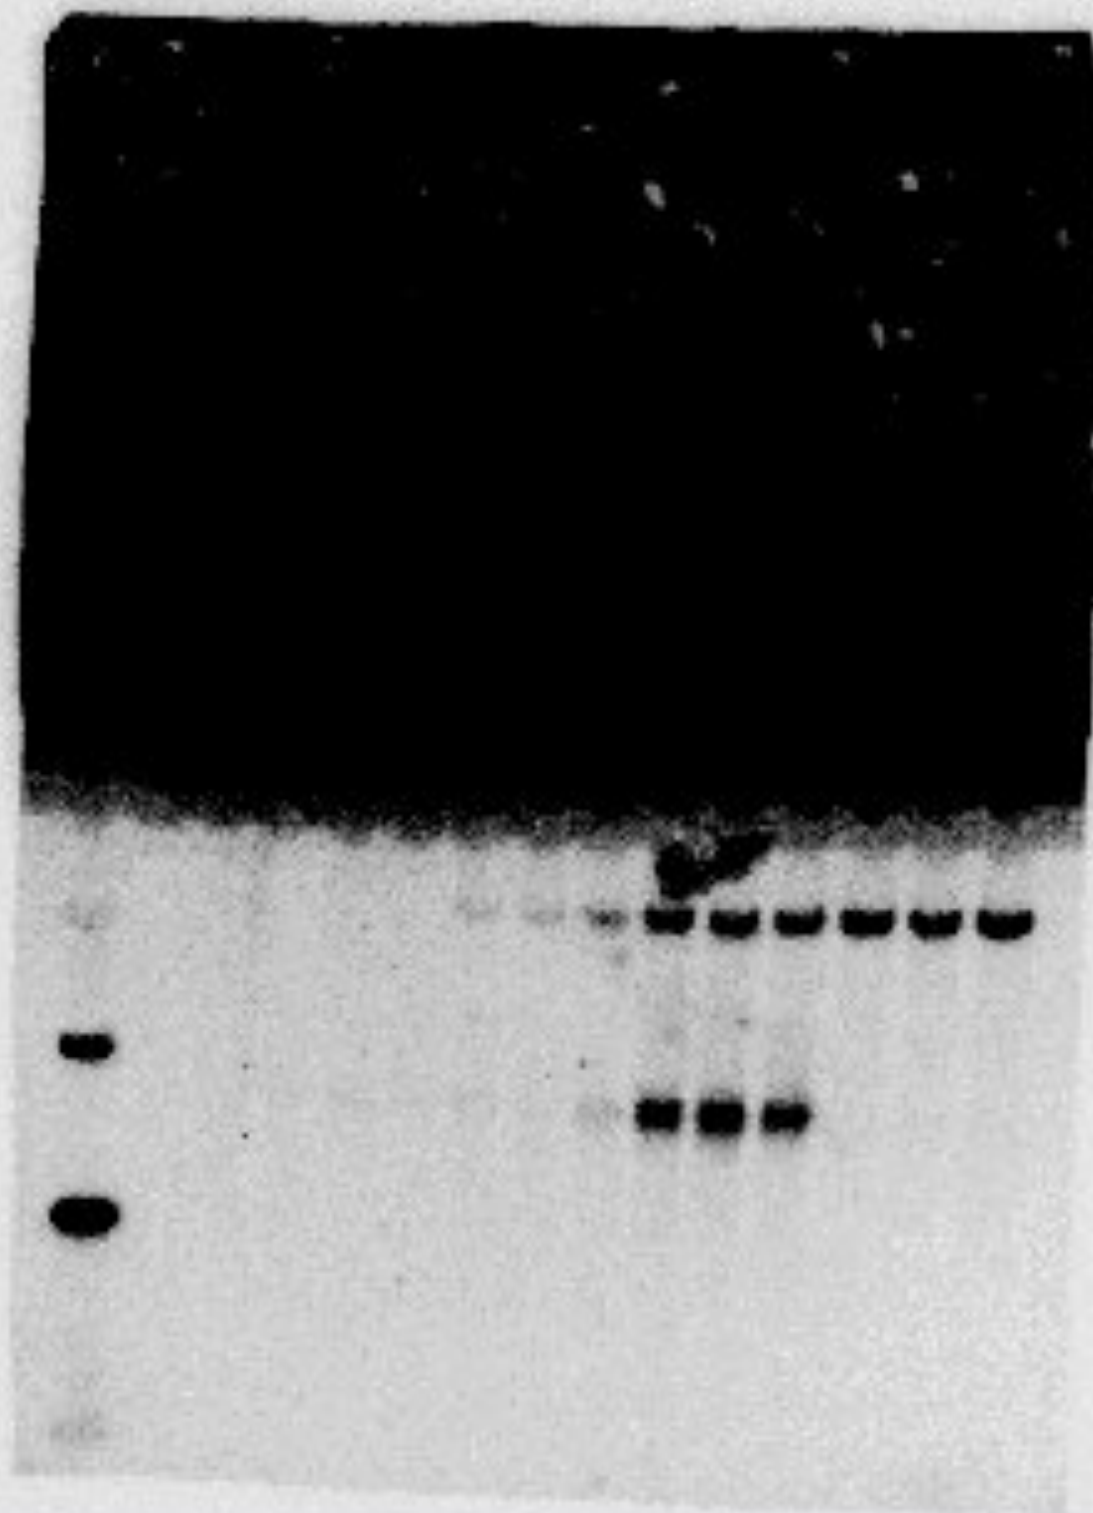



Related to Fig. 8C\_Southern blotting

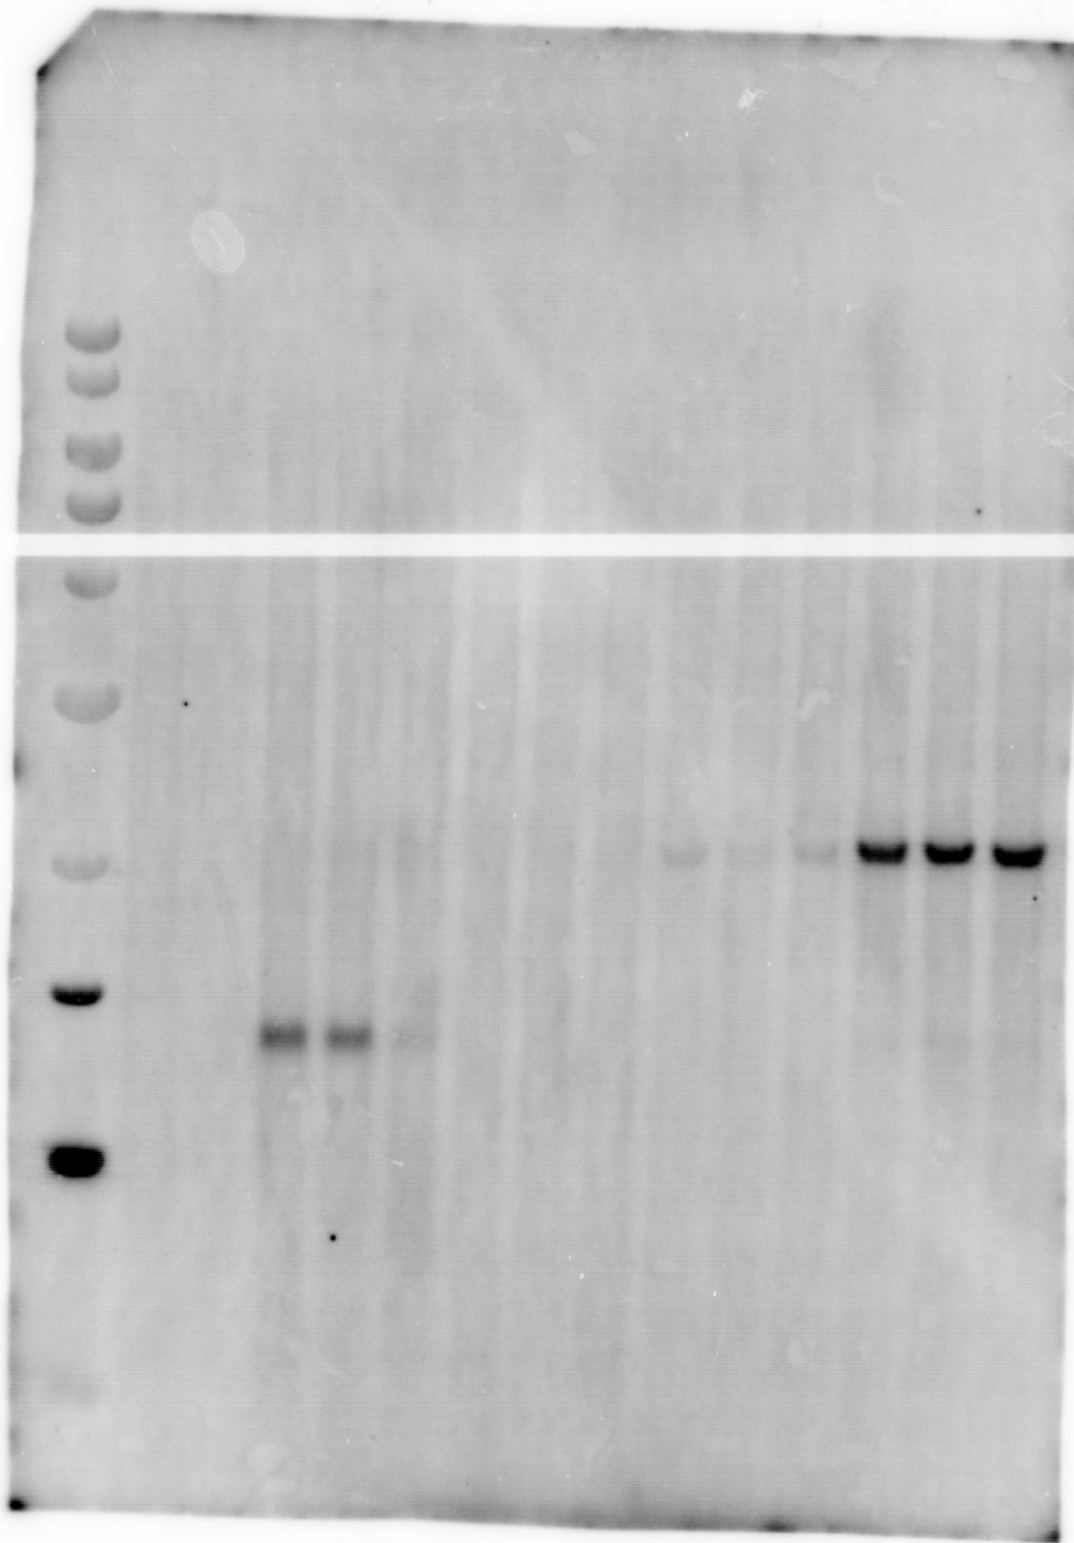

Supplement: Supplementary file 1 [file 709c0880620ac050974f16c0.pdf]
